# Supplementary material
Source: Royal Society of Chemistry journal article supplement (doi:10.1039/d6ce00234j)
Supplement: d6ce00234j1.pdf [file d6ce00234j1.pdf]

## Supplementary Information

for

### One step formation of amino derivative of *closo*-decaborate anion with *exo*-polyhedral benzimidazole groups during cadmium(II) complexation

**Table S1.** Crystal data and structure refinement for all compounds studied.

| Compound                                     | <b>1</b>                                                                        | <b>5</b>                                                           | L <sup>1</sup>                                       |
|----------------------------------------------|---------------------------------------------------------------------------------|--------------------------------------------------------------------|------------------------------------------------------|
| CCDC                                         | 2500848                                                                         | 2500849                                                            | 2500850                                              |
| Empirical formula                            | C <sub>38</sub> H <sub>56</sub> B <sub>20</sub> Cd <sub>2</sub> N <sub>12</sub> | C <sub>22</sub> H <sub>38</sub> B <sub>10</sub> CdN <sub>6</sub> O | C <sub>17</sub> H <sub>15</sub> N <sub>5</sub>       |
| Formula weight                               | 1121.94                                                                         | 623.08                                                             | 289.34                                               |
| Temperature, K                               | 100.00                                                                          | 100                                                                | 100.00                                               |
| Crystal system                               | monoclinic                                                                      | orthorhombic                                                       | monoclinic                                           |
| Space group                                  | <i>P2<sub>1</sub>/n</i>                                                         | <i>Pbca</i>                                                        | <i>P2<sub>1</sub>/n</i>                              |
| a, Å                                         | 11.7328(6)                                                                      | 11.5923(7)                                                         | 6.3413(7)                                            |
| b, Å                                         | 16.9377(7)                                                                      | 20.2261(9)                                                         | 7.4223(7)                                            |
| c, Å                                         | 12.8151(7)                                                                      | 25.0151(16)                                                        | 29.993(3)                                            |
| β, °                                         | 101.554(2)                                                                      | 90                                                                 | 93.188(4)                                            |
| Volume, Å <sup>3</sup>                       | 2495.1(2)                                                                       | 5865.2(6)                                                          | 1409.5(2)                                            |
| Z                                            | 2                                                                               | 8                                                                  | 4                                                    |
| <i>d</i> <sub>calc</sub> , g/cm <sup>3</sup> | 1.493                                                                           | 1.411                                                              | 1.363                                                |
| μ, mm <sup>-1</sup>                          | 0.898                                                                           | 0.774                                                              | 0.086                                                |
| <i>F</i> (000)                               | 1128.0                                                                          | 2544.0                                                             | 608.0                                                |
| Radiation                                    | MoKα (λ = 0.71073)                                                              | MoKα (λ = 0.71073)                                                 | MoKα (λ = 0.71073)                                   |
| Index ranges                                 | -15 ≤ h ≤ 13,<br>-21 ≤ k ≤ 18,<br>-16 ≤ l ≤ 16                                  | -14 ≤ h ≤ 15,<br>-25 ≤ k ≤ 24,<br>-19 ≤ l ≤ 32                     | -7 ≤ h ≤ 7,<br>-8 ≤ k ≤ 8,<br>-35 ≤ l ≤ 35           |
| Reflections collected                        | 11251                                                                           | 30523                                                              | 9727                                                 |
| Independent reflections                      | 5513 [R <sub>int</sub> = 0.0563]                                                | 6873 [R <sub>int</sub> = 0.0769]                                   | 2491 [R <sub>int</sub> = 0.0869]                     |
| Goodness-of-fit on F <sup>2</sup>            | 1.033                                                                           | 1.022                                                              | 1.036                                                |
| Final R indexes<br>[I ≥ 2σ (I)]              | R <sub>1</sub> = 0.0528,<br>wR <sub>2</sub> = 0.1097                            | R <sub>1</sub> = 0.0411,<br>wR <sub>2</sub> = 0.0791               | R <sub>1</sub> = 0.0823,<br>wR <sub>2</sub> = 0.1876 |
| Final R indexes<br>[all data]                | R <sub>1</sub> = 0.0872,<br>wR <sub>2</sub> = 0.1242                            | R <sub>1</sub> = 0.0715,<br>wR <sub>2</sub> = 0.0948               | R <sub>1</sub> = 0.1479,<br>wR <sub>2</sub> = 0.2238 |

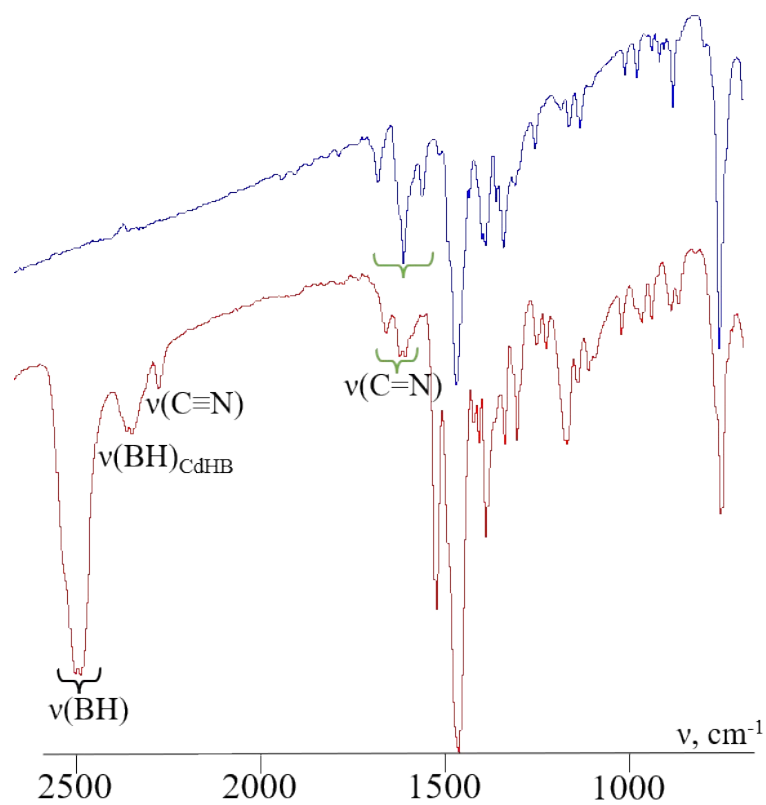

**Fig. S1.** Fragments of IR spectra of L<sup>1</sup> (blue) and complex 1 (red).

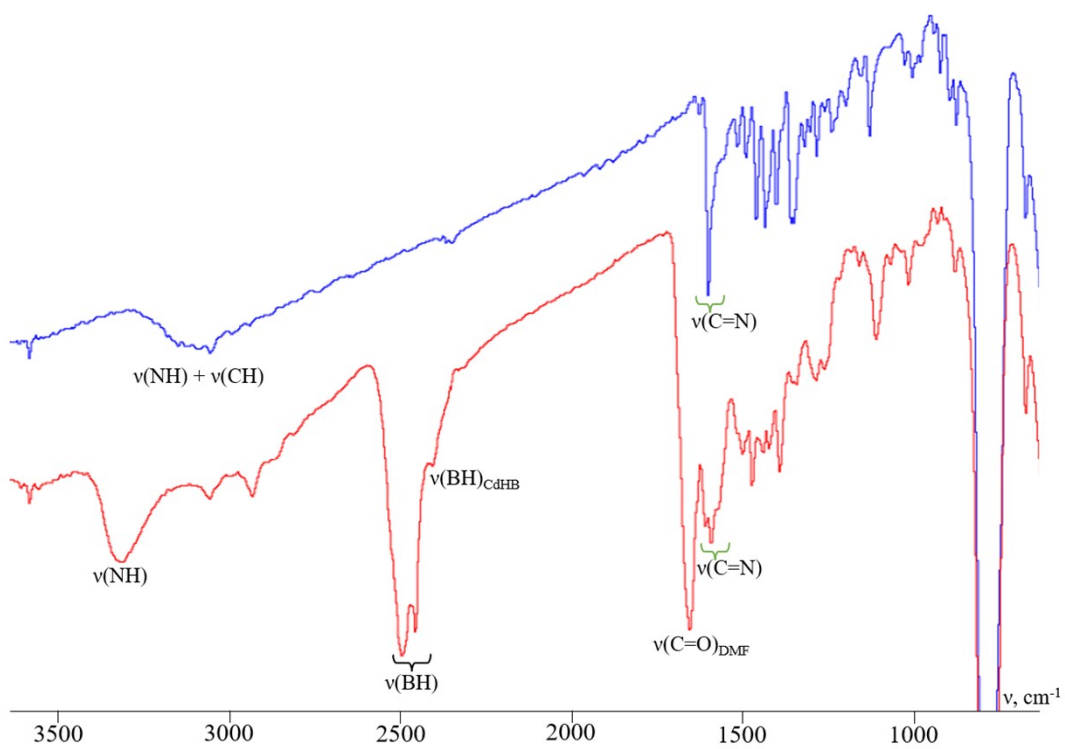

**Fig. S2.** IR spectra of L<sup>2</sup> (blue) and complex 2 (red).

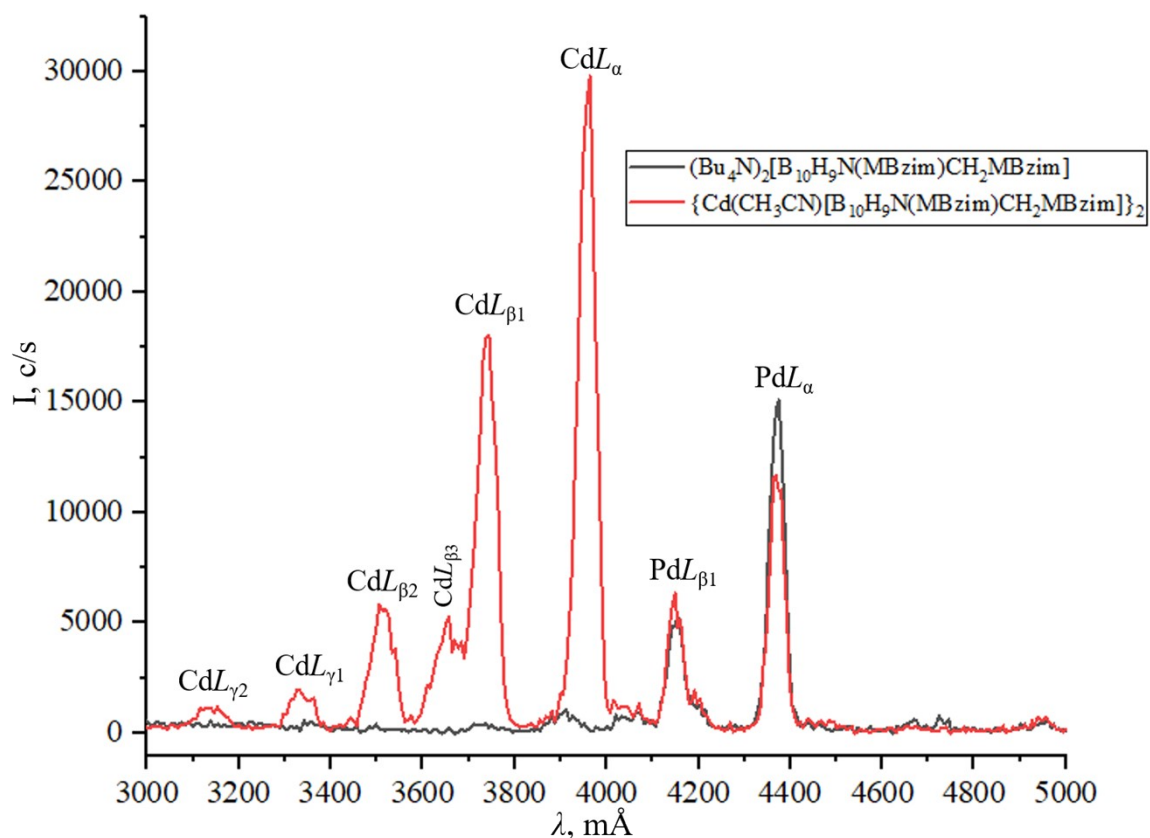

**Fig. S3.** X-ray spectral fluorescence spectra of  $\{\text{Cd}(\text{CH}_3\text{CN})[\text{B}_{10}\text{H}_9\text{N}(\text{MBzim})\text{CH}_2\text{MBzim}]\}_2$  (**1**) (red) and  $(\text{Bu}_4\text{N})_2[\text{B}_{10}\text{H}_9\text{N}(\text{MBzim})\text{CH}_2\text{MBzim}]$  (**3**) (black).

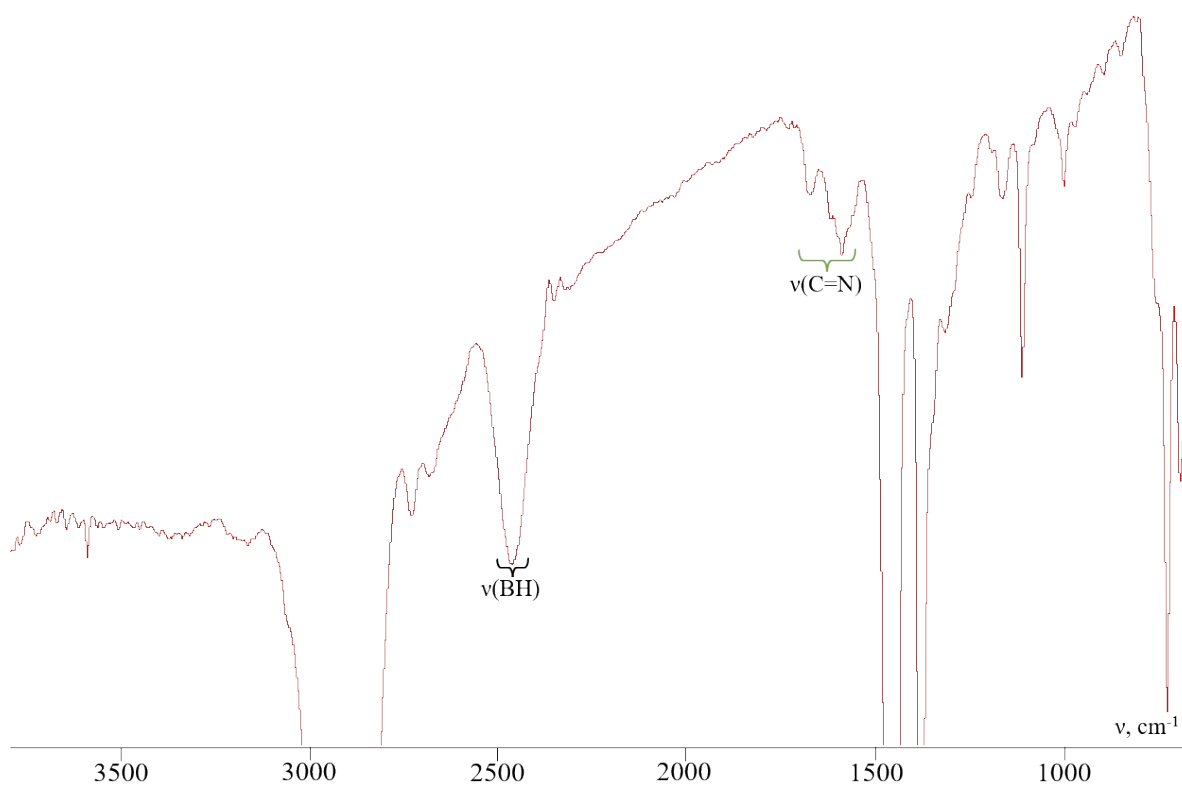

**Fig. S4.** IR spectrum of  $(\text{Bu}_4\text{N})_2[\text{B}_{10}\text{H}_9\text{N}(\text{MBzim})\text{CH}_2\text{MBzim}]$  (**3**).

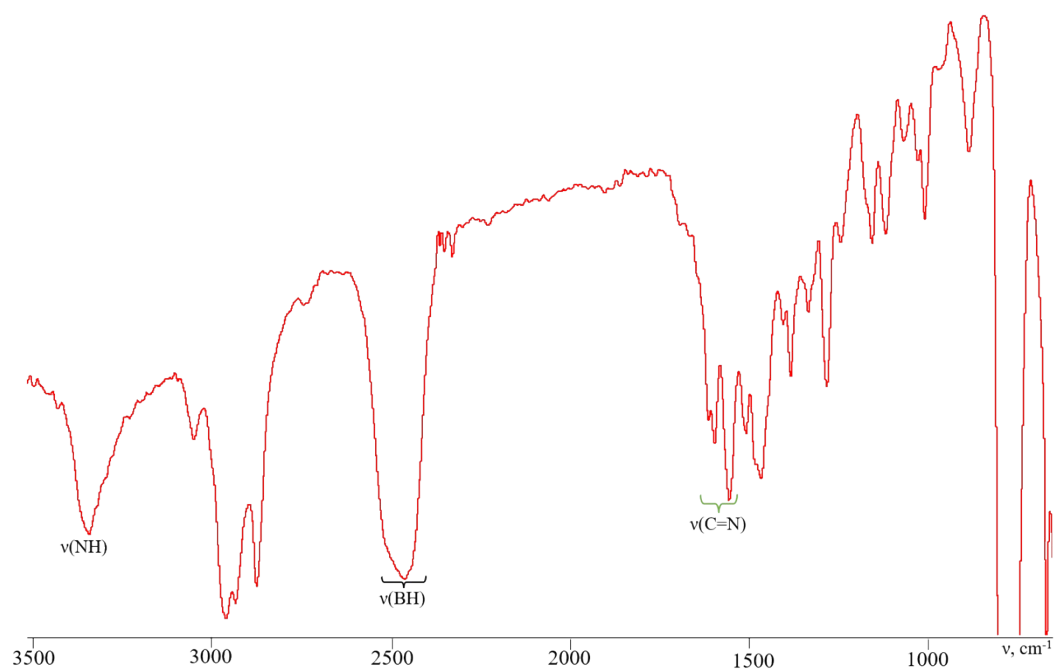

**Fig. S5.** IR spectrum of  $(\text{Bu}_4\text{N})_2[\text{B}_{10}\text{H}_9\text{HN}^+\text{B}(\text{MBzim})\text{CH}_2\text{Bzid}^-]$  (**4**).

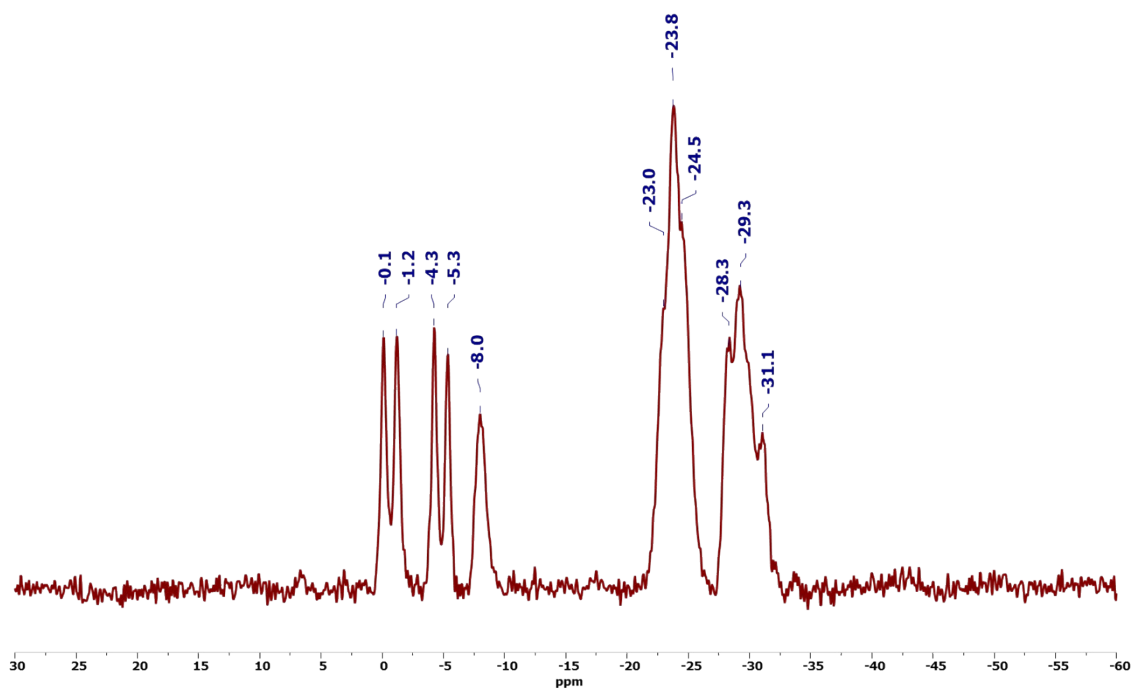

**Fig. S6.**  $^{11}\text{B}$  NMR spectrum of  $(\text{Bu}_4\text{N})_2[\text{B}_{10}\text{H}_9\text{N}(\text{MBzim})\text{CH}_2\text{MBzim}]$  (**3**) in  $(\text{CD}_3)_2\text{CO}$ .

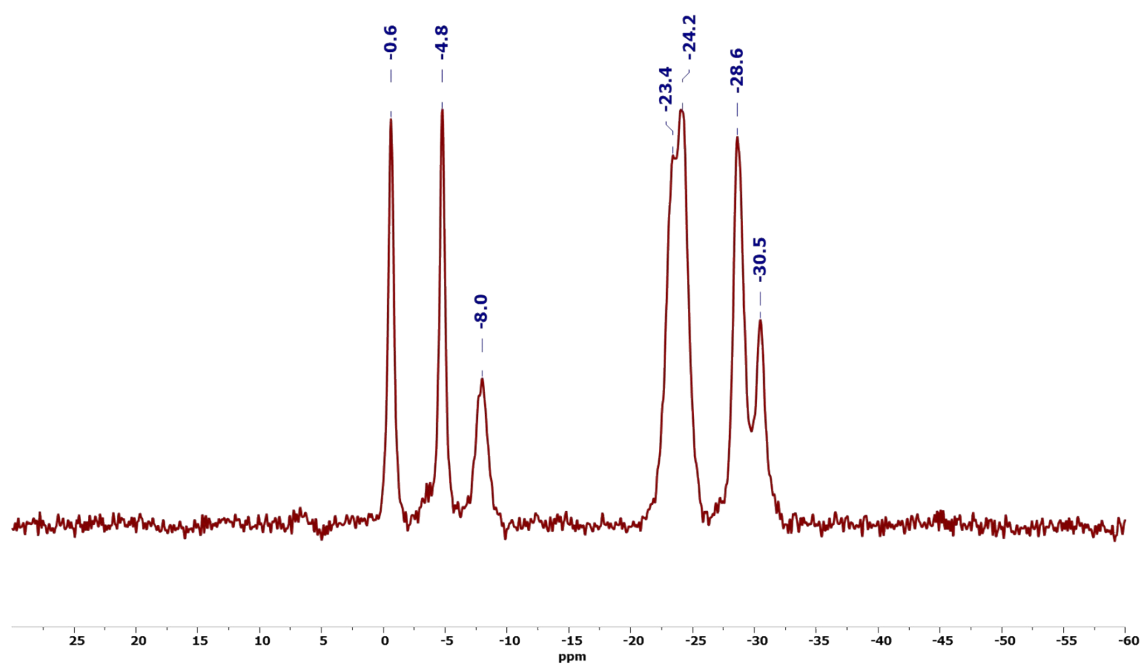

**Fig. S7.**  $^{11}\text{B}\{^1\text{H}\}$  NMR spectrum of  $(\text{Bu}_4\text{N})_2[\text{B}_{10}\text{H}_9\text{N}(\text{MBzim})\text{CH}_2\text{MBzim}]$  (**3**) in  $(\text{CD}_3)_2\text{CO}$ .

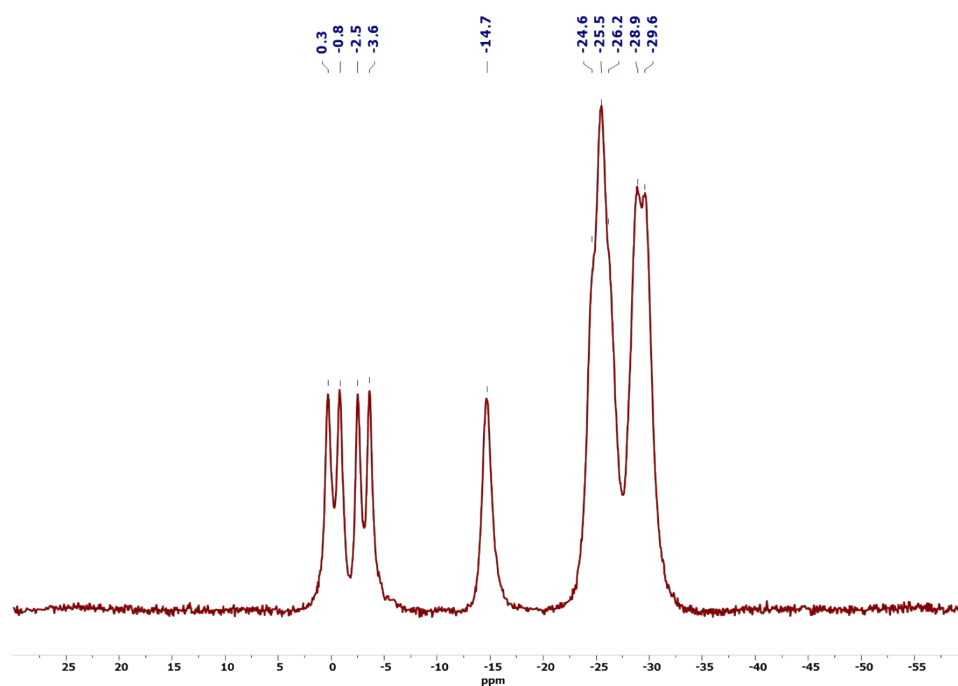

**Fig. S8.**  $^{11}\text{B}$  NMR spectrum of  $(\text{Bu}_4\text{N})_2[\text{B}_{10}\text{H}_9\text{HN}^+\text{B}(\text{MBzim})\text{CH}_2\text{Bzid}^-]$  (**4**) in  $(\text{CD}_3)_2\text{CO}$ .

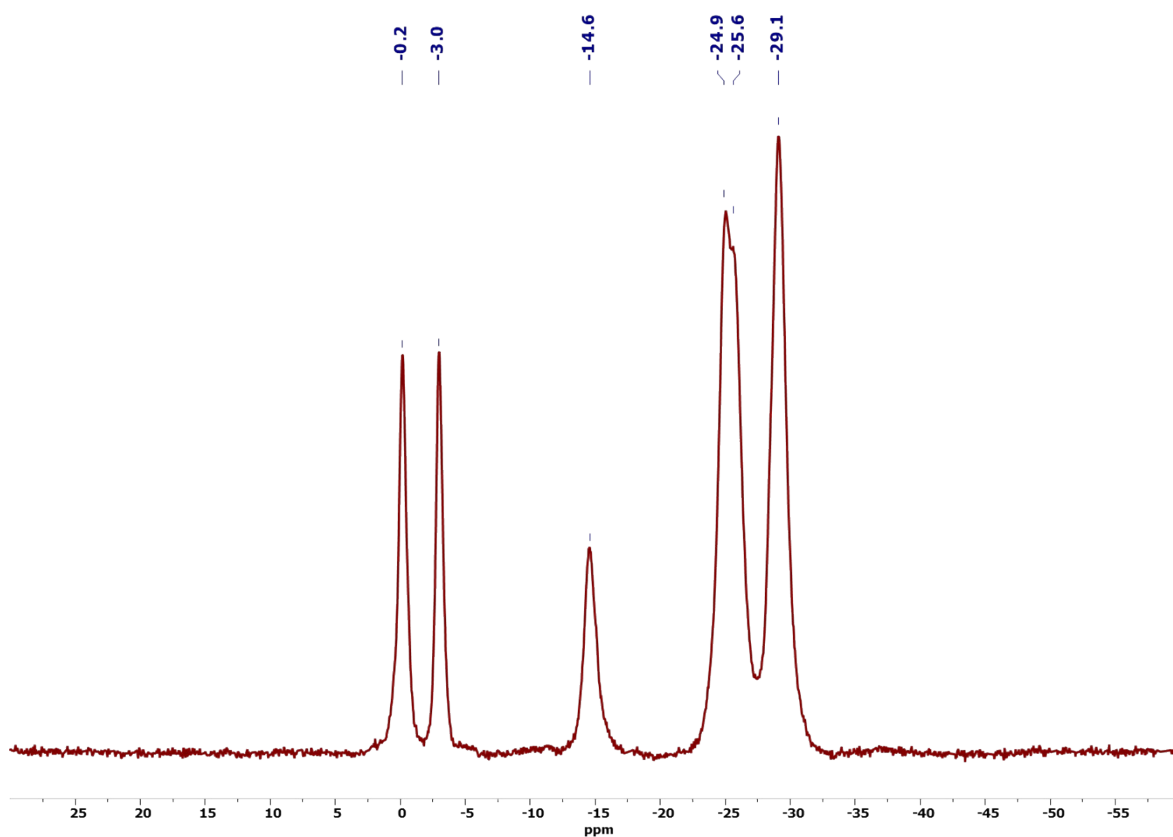

**Fig. S9.**  $^{11}\text{B}\{^1\text{H}\}$  NMR spectrum of  $(\text{Bu}_4\text{N})_2[\text{B}_{10}\text{H}_9\text{HN}^+\text{B}(\text{MBzim})\text{CH}_2\text{Bzid}^-]$  (**4**) in  $(\text{CD}_3)_2\text{CO}$ .

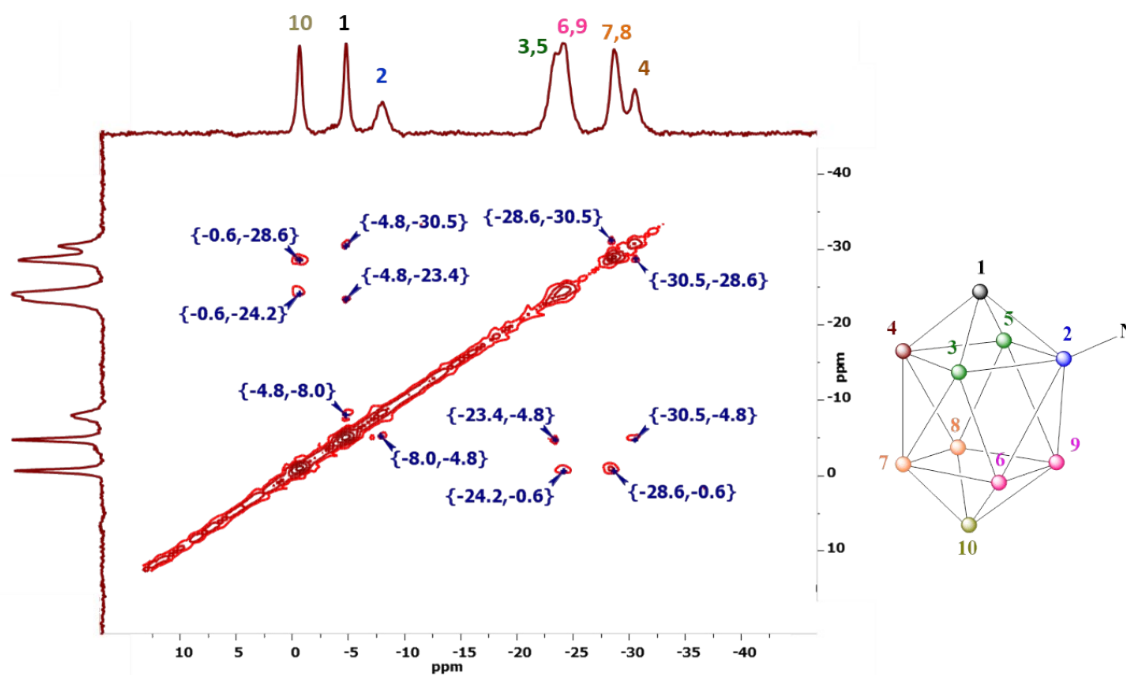

**Fig. S10.** COSY  $^{11}\text{B}\{^1\text{H}\}-^{11}\text{B}\{^1\text{H}\}$  NMR spectrum of  $(\text{Bu}_4\text{N})_2[\text{B}_{10}\text{H}_9\text{N}(\text{MBzim})\text{CH}_2\text{MBzim}]$  (**3**) in  $(\text{CD}_3)_2\text{CO}$  using additional symmetry function.

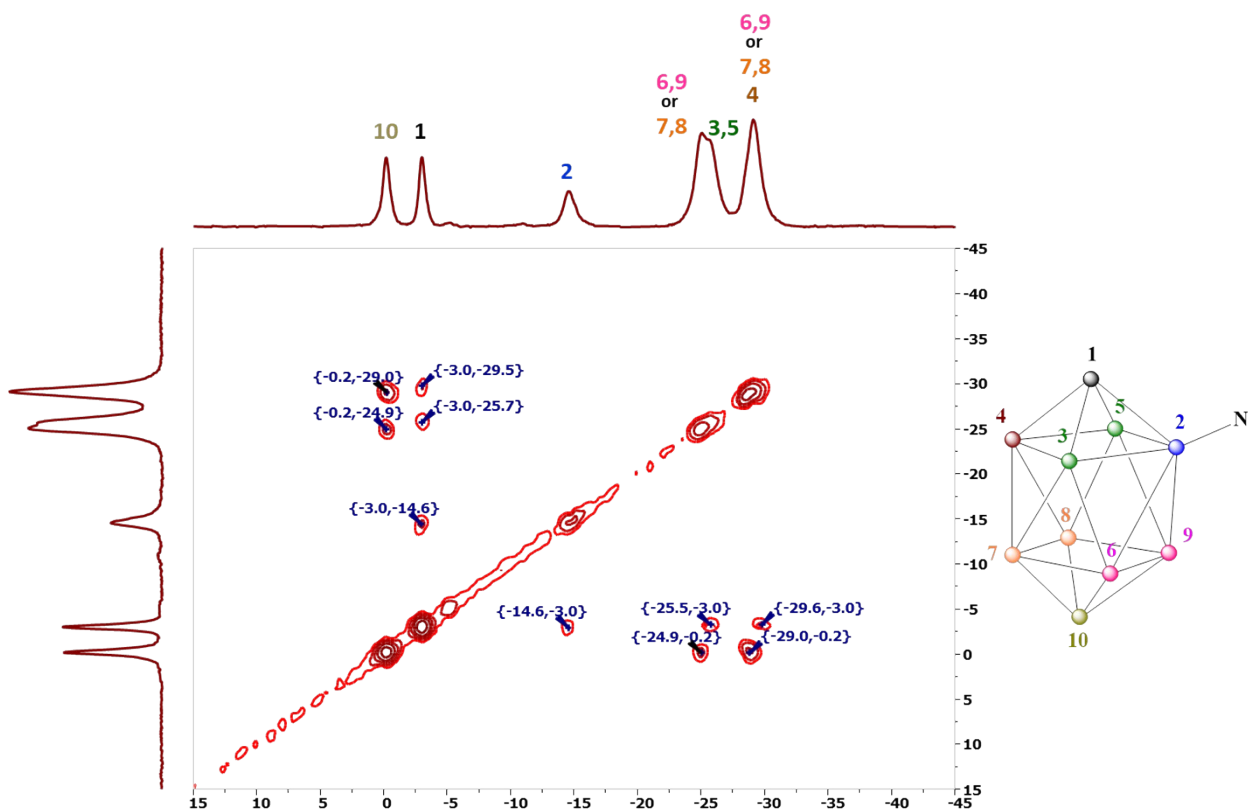

**Fig. S11.** COSY  $^{11}\text{B}\{^1\text{H}\}\text{-}^{11}\text{B}\{^1\text{H}\}$  NMR spectrum of  $(\text{Bu}_4\text{N})_2[\text{B}_{10}\text{H}_9\text{HN}^+\text{B}(\text{MBzim})\text{CH}_2\text{Bzid}^-]$  (**4**) in  $(\text{CD}_3)_2\text{CO}$ .

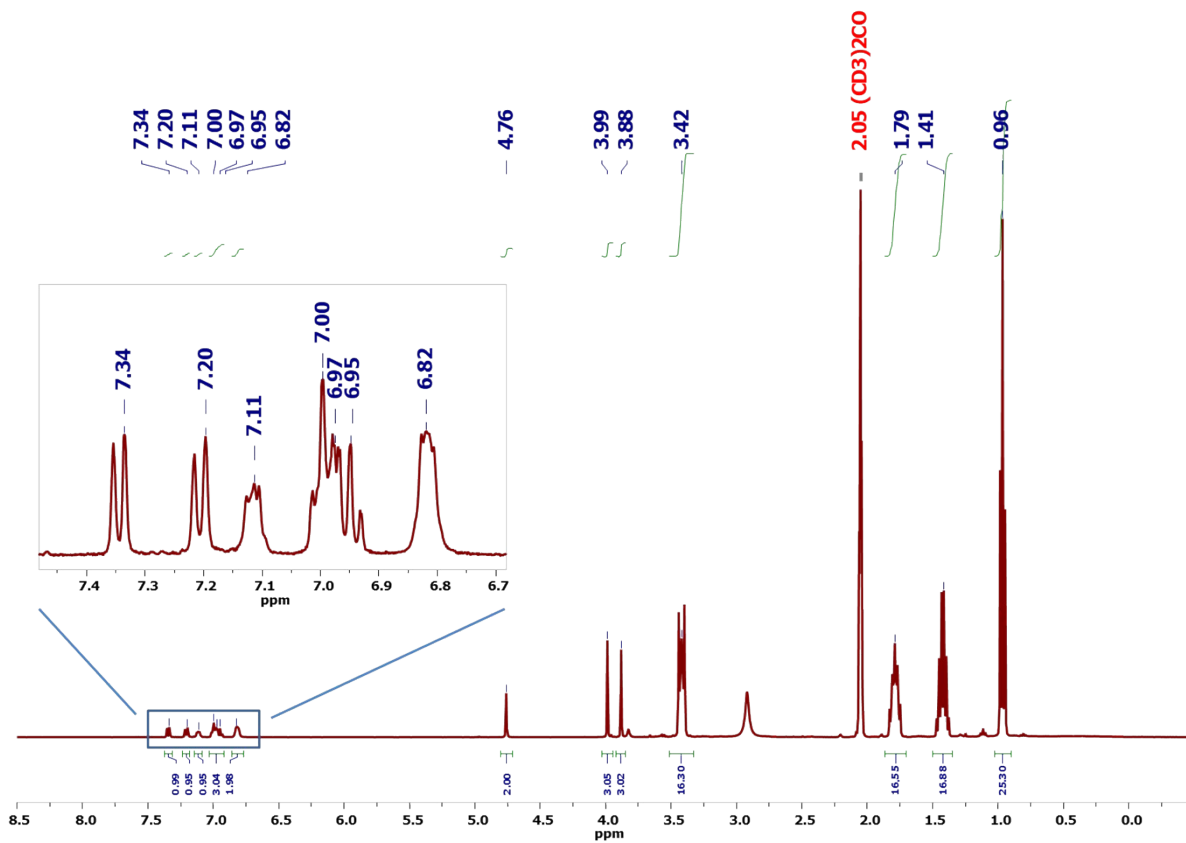

**Fig. S12.**  $^1\text{H}$  NMR spectrum of  $(\text{Bu}_4\text{N})_2[\text{B}_{10}\text{H}_9\text{N}(\text{MBzim})\text{CH}_2\text{MBzim}]$  (**3**) in  $(\text{CD}_3)_2\text{CO}$ .

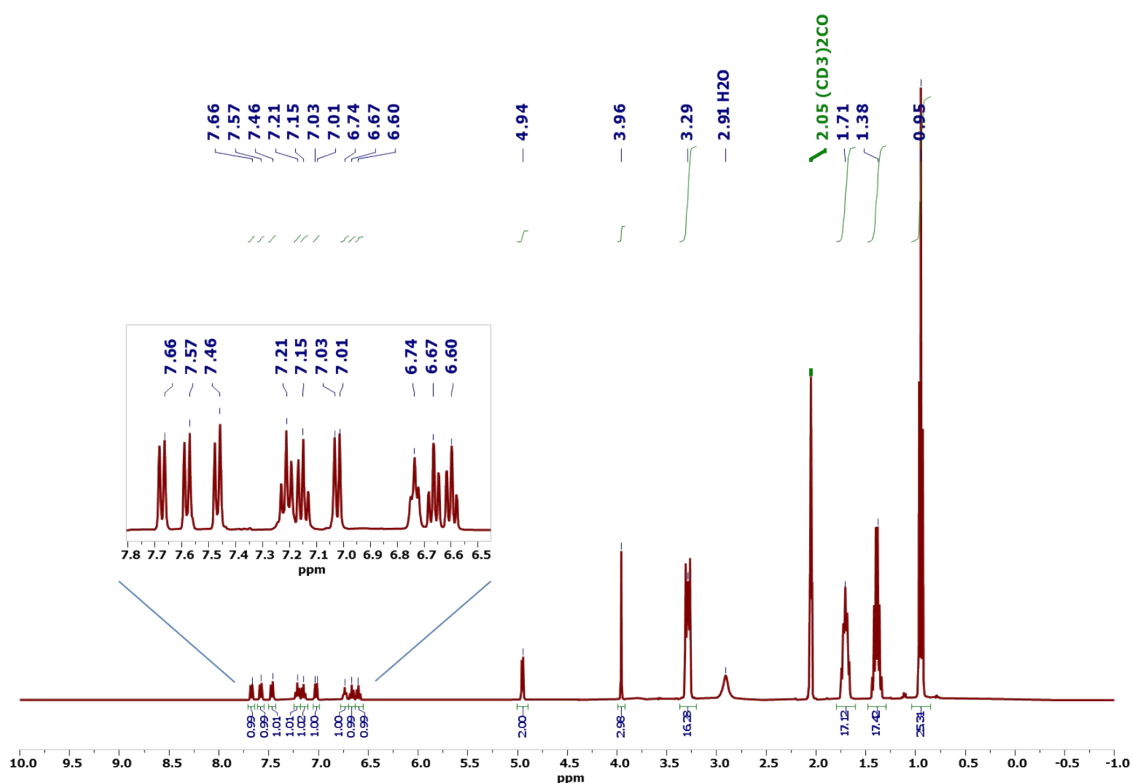

Fig. S13. <sup>1</sup>H NMR spectrum of (Bu<sub>4</sub>N)<sub>2</sub>[B<sub>10</sub>H<sub>9</sub>HN<sup>+</sup>B(MBzim)CH<sub>2</sub>Bzid<sup>-</sup>] (4) in (CD<sub>3</sub>)<sub>2</sub>CO.

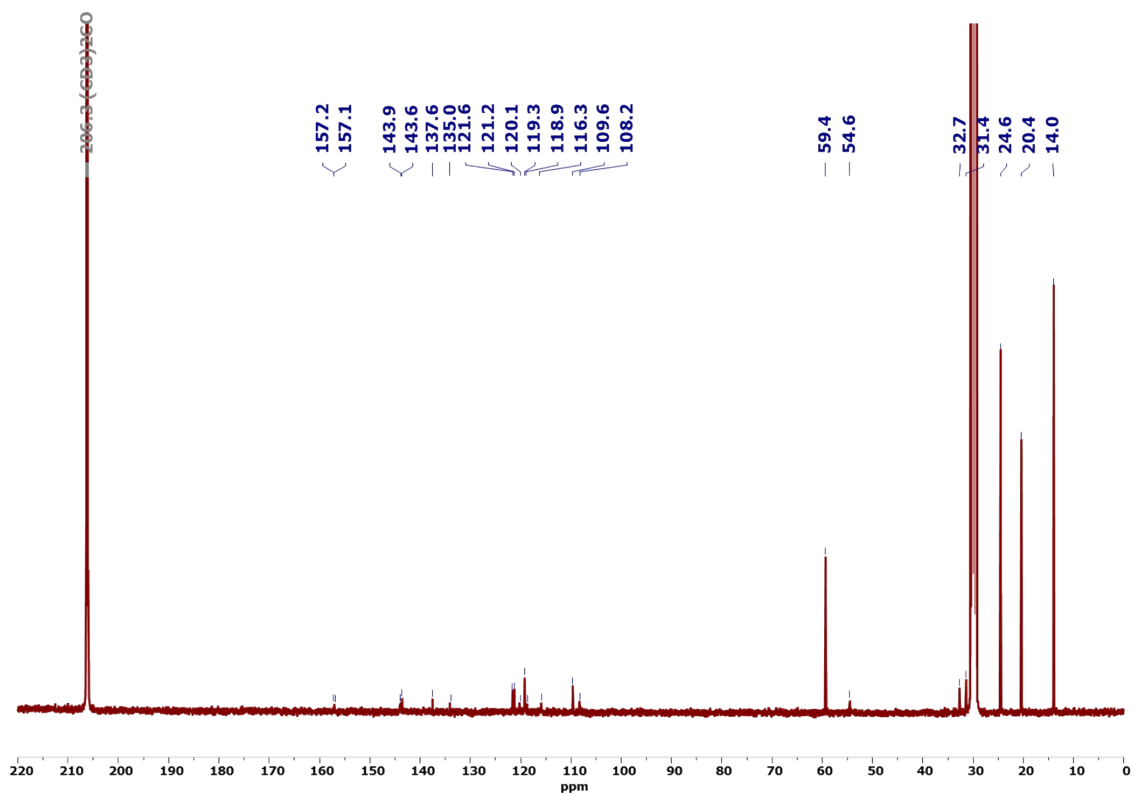

Fig. S14. <sup>13</sup>C {<sup>1</sup>H} NMR spectrum of (Bu<sub>4</sub>N)<sub>2</sub>[B<sub>10</sub>H<sub>9</sub>N(MBzim)CH<sub>2</sub>MBzim] (3) in (CD<sub>3</sub>)<sub>2</sub>CO.

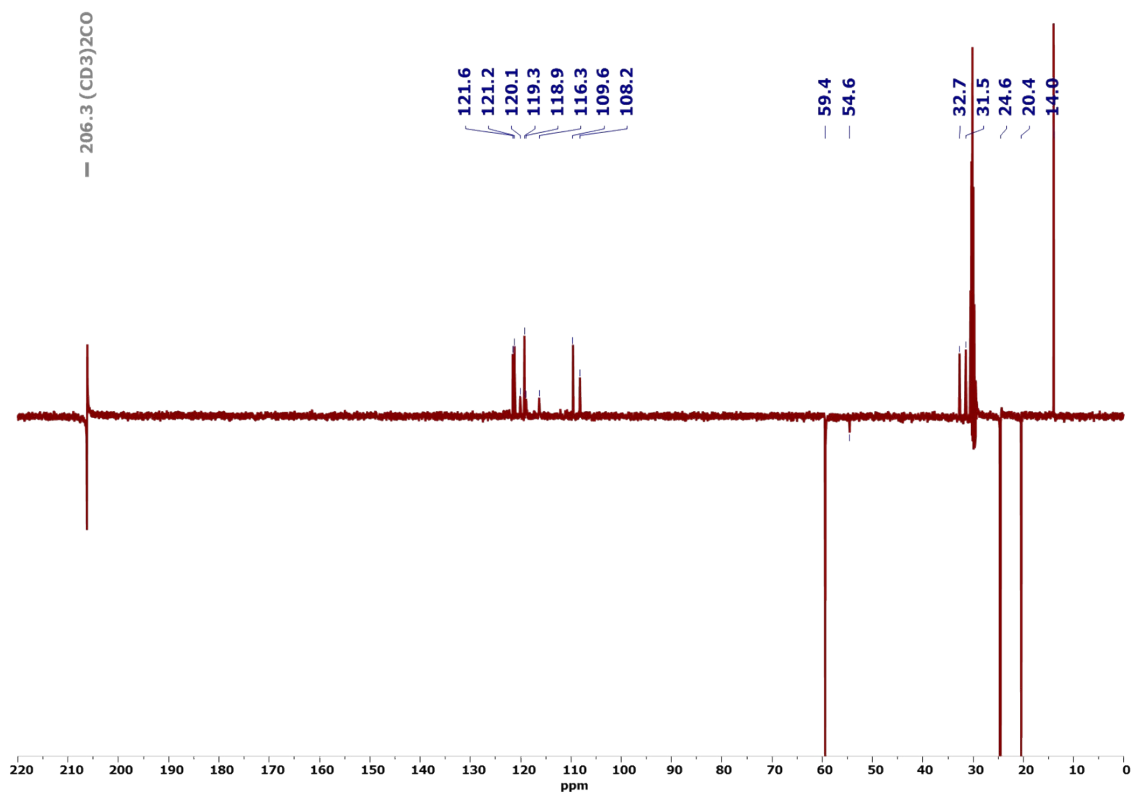

**Fig. S15.**  $^{13}\text{C}\{^1\text{H}\}$ -DEPT135 NMR spectrum of  $(\text{Bu}_4\text{N})_2[\text{B}_{10}\text{H}_9\text{N}(\text{MBzim})\text{CH}_2\text{MBzim}]$  (**3**) in  $(\text{CD}_3)_2\text{CO}$ .

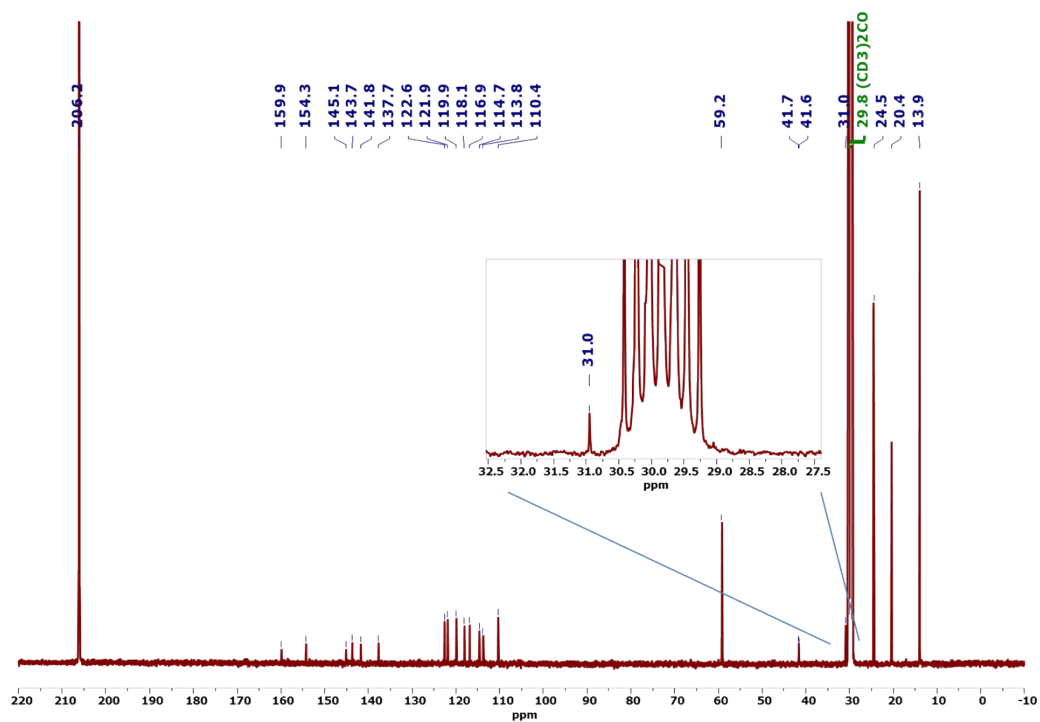

**Fig. S16.**  $^{13}\text{C}\{^1\text{H}\}$  NMR spectrum of  $(\text{Bu}_4\text{N})_2[\text{B}_{10}\text{H}_9\text{HN}^+\text{B}(\text{MBzim})\text{CH}_2\text{Bzid}^-]$  (**4**) in  $(\text{CD}_3)_2\text{CO}$ .

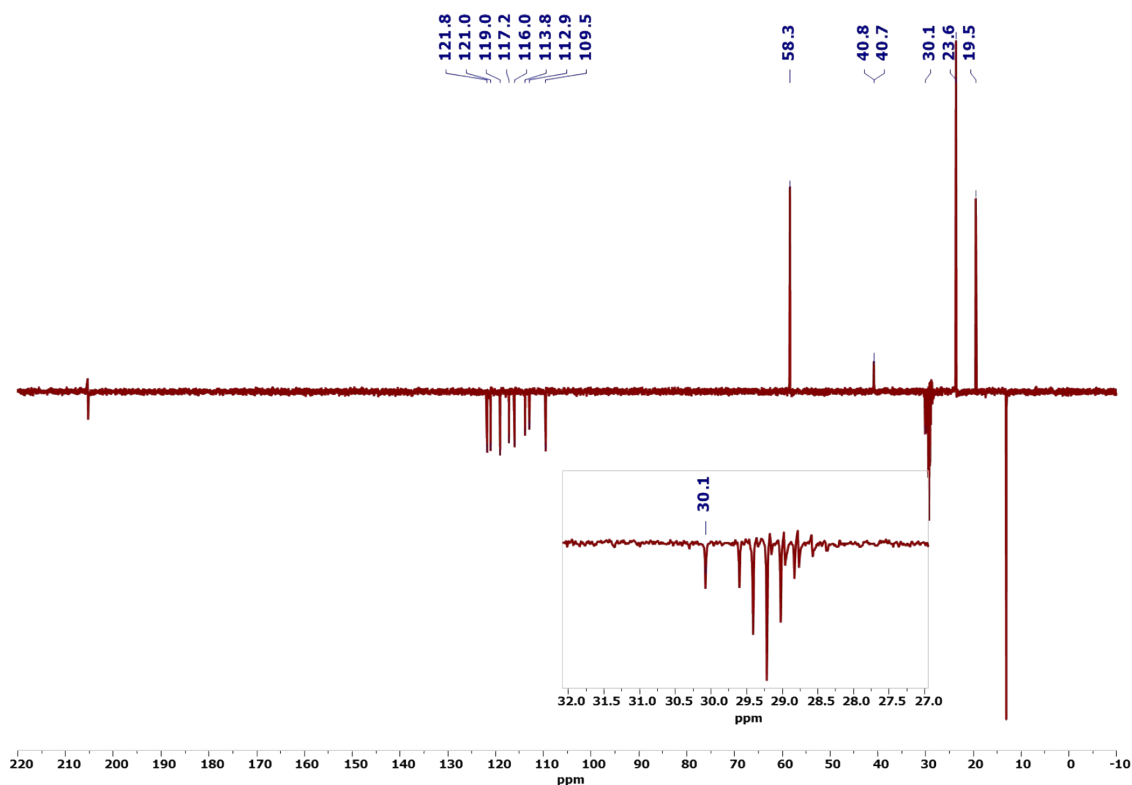

**Fig. S17.**  $^{13}\text{C}\{^1\text{H}\}$ -DEPT135 NMR spectrum of  $(\text{Bu}_4\text{N})_2[\text{B}_{10}\text{H}_9\text{HN}^+\text{B}(\text{MBzim})\text{CH}_2\text{Bzid}^-]$  (**4**) in  $(\text{CD}_3)_2\text{CO}$ .

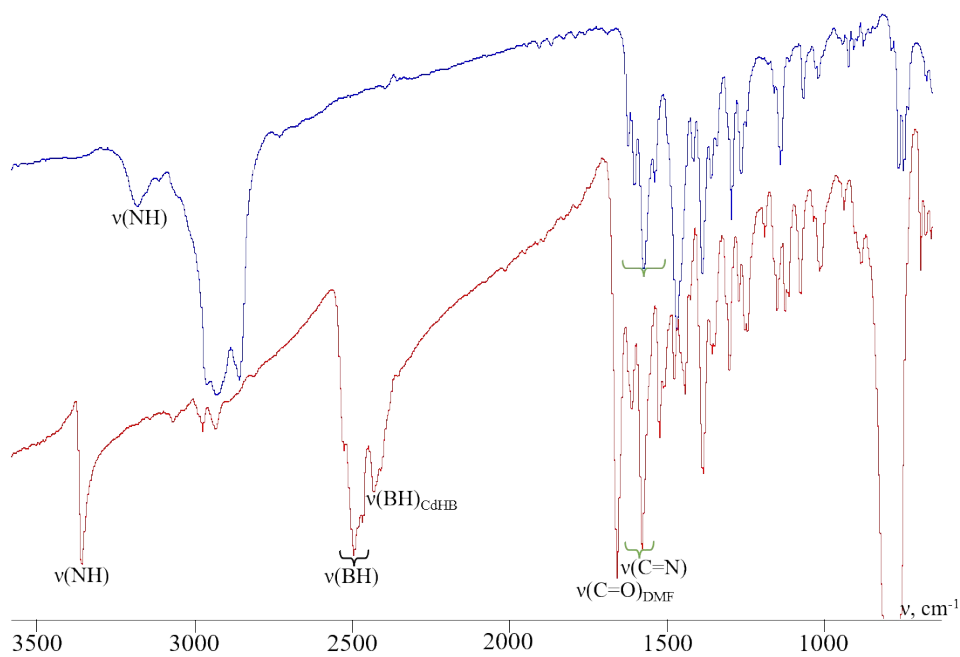

**Fig. S18.** IR spectra of  $\text{L}^3$  (blue) and complex **5** (red).

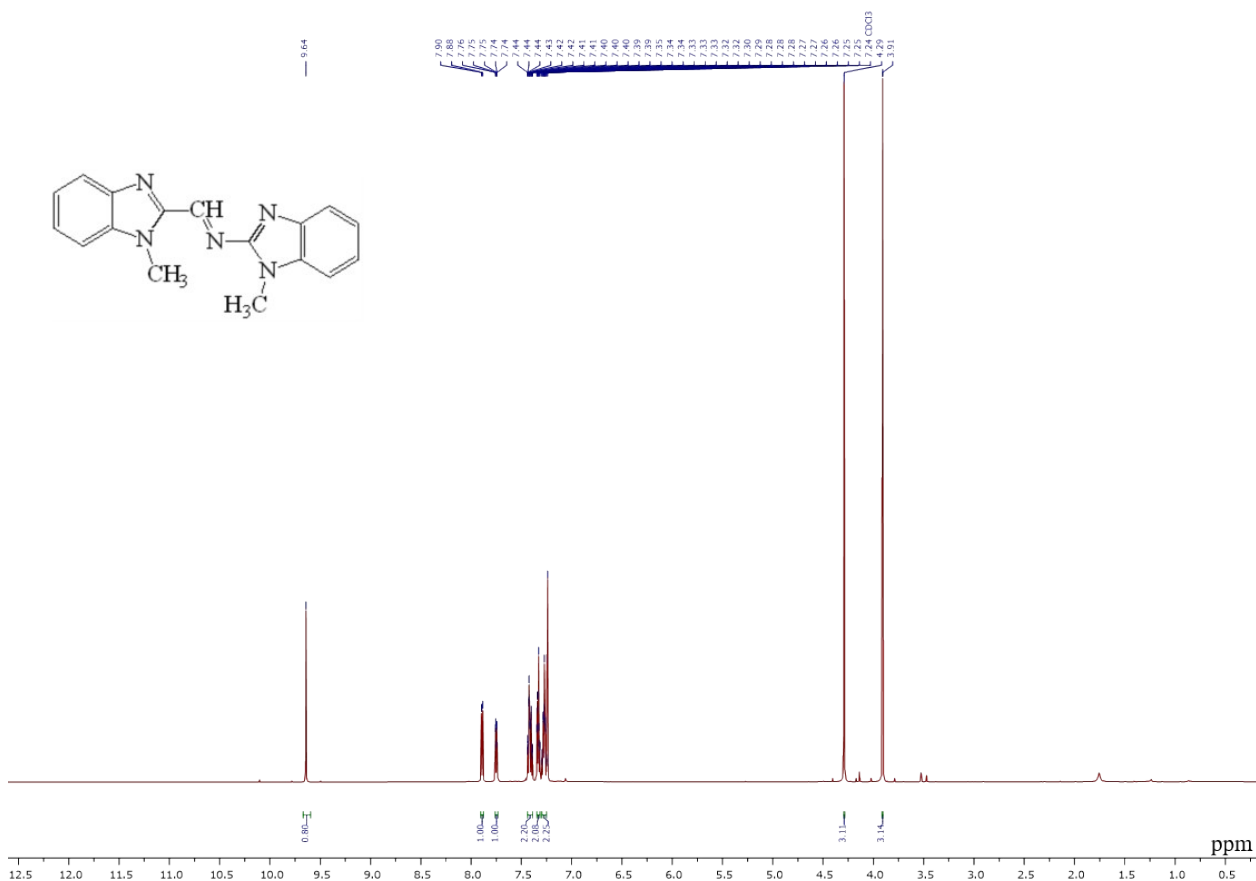

**Fig. S19.**  $^1\text{H}$  NMR spectrum of *N*,1-bis(1-methylbenzimidazol-2-yl)methanimine ( $L^1$ ).

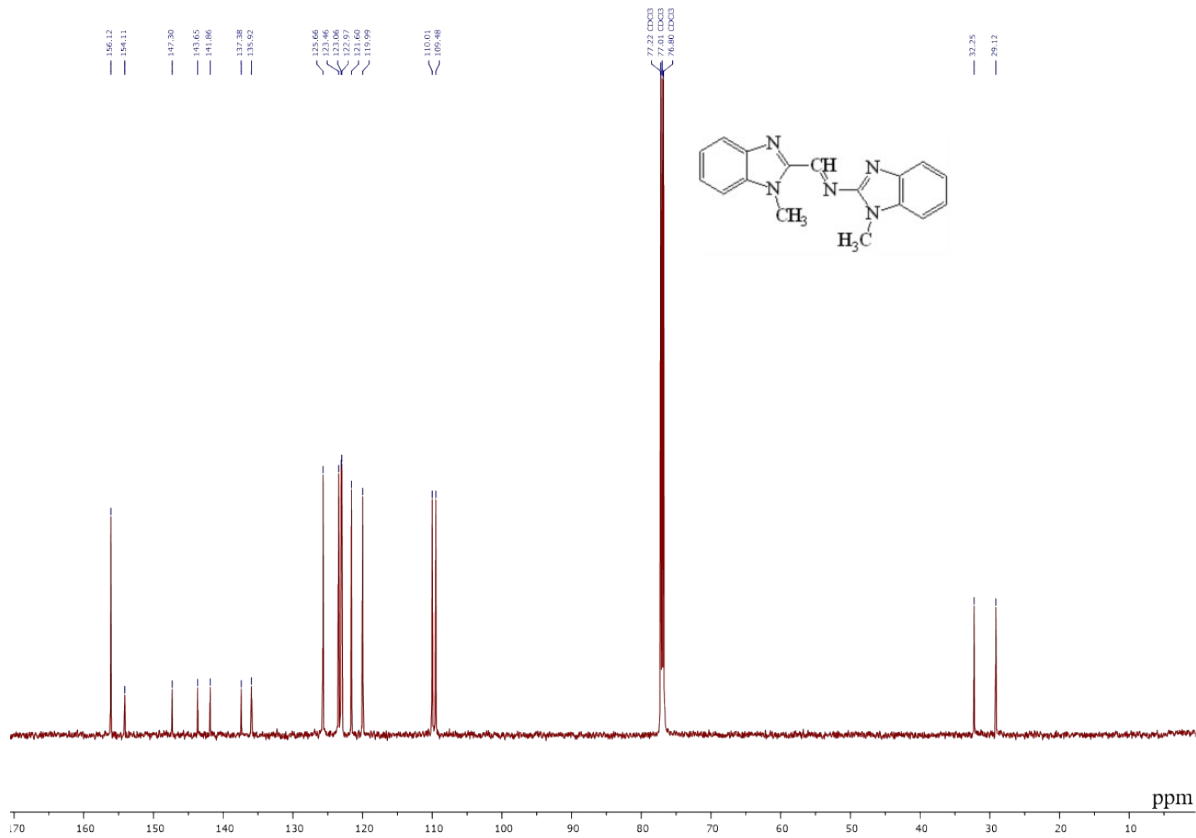

**Fig. S20.**  $^{13}\text{C}$  NMR spectrum of *N*,1-bis(1-methylbenzimidazol-2-yl)methanimine ( $L^1$ ).

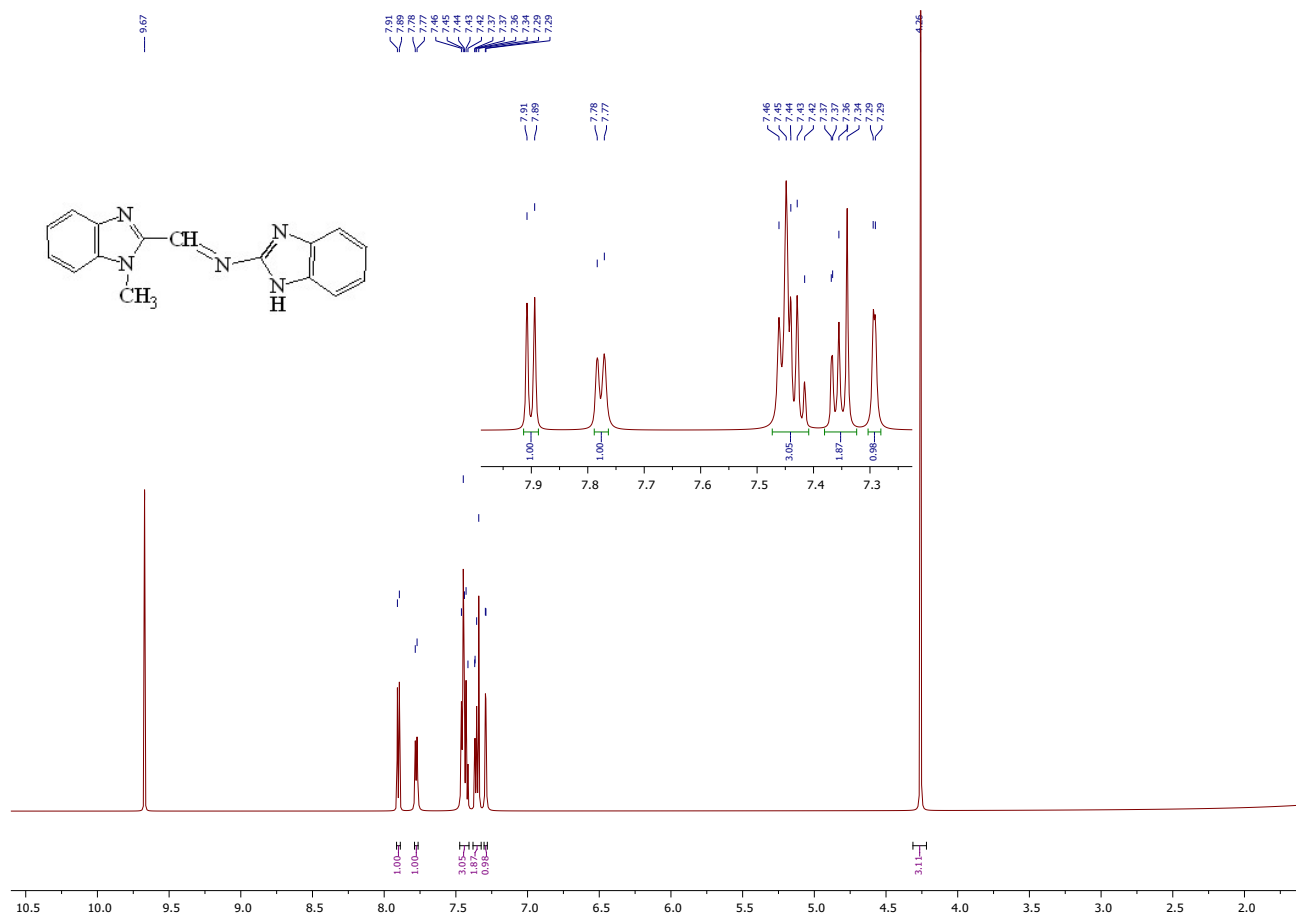

Fig. S21.  $^1\text{H NMR}$  spectrum of *N*-(benzimidazol-2-yl)-1-(1-methylbenzimidazol-2-yl)methanimine ( $L^2$ ).

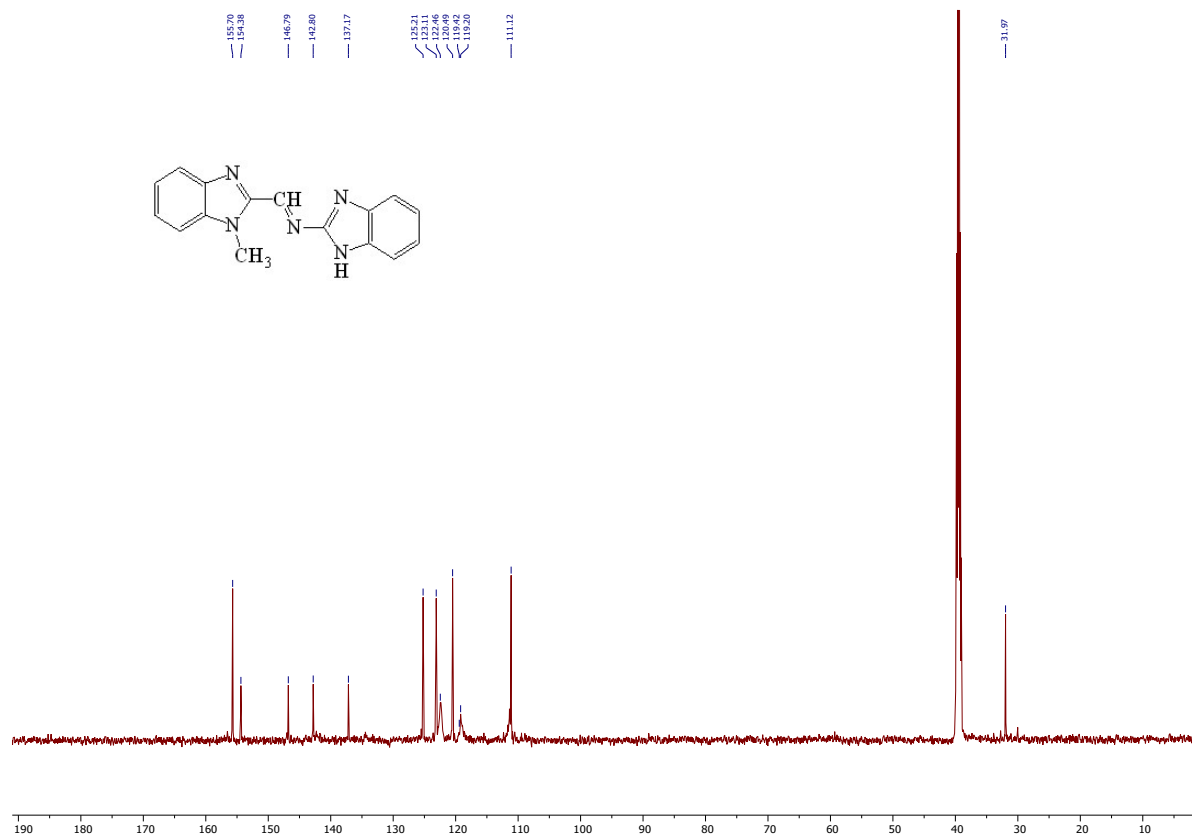

Fig. S22.  $^{13}\text{C NMR}$  spectrum of *N*-(benzimidazol-2-yl)-1-(1-methylbenzimidazol-2-yl)methanimine ( $L^2$ ).
